# Supplementary material for: Sorption Profile of Low Specific Activity 99Mo on Nanoceria-Based Sorbents for the Development of 99mTc Generators: Kinetics, Equilibrium, and Thermodynamic Studies
Source: MDPI journal article supplement (doi:10.3390/nano12091587), 2022-05-07
Supplement: s1 [file s1]

## Sorption Profile of Low Specific Activity $^{99}\text{Mo}$ on Nanoceria-Based Sorbents for the development of $^{99\text{m}}\text{Tc}$ Generators: Kinetics, Equilibrium, and Thermodynamic Studies

Mohamed F. Nawar <sup>1\*</sup>, Alaa F. El-Daoushy <sup>2</sup>, Metwally Madkour <sup>3</sup>, and A. Türlér <sup>1</sup>

<sup>1</sup> Department of Chemistry, Biochemistry, and Pharmaceutical Sciences, Faculty of Science, University of Bern, Freiestrasse 3, CH-3012 Bern, Switzerland.

<sup>2</sup> Radioactive Isotopes and Generators Dept., Hot Laboratories Center, Egyptian Atomic Energy Authority, 13759, Cairo, Egypt

<sup>3</sup> Chemistry Department, Faculty of Science, Kuwait University, 5969, Safat, 13060, Kuwait.

\* Correspondence: mohamed.nawar@unibe.ch; mohamedfnawar@yahoo.com

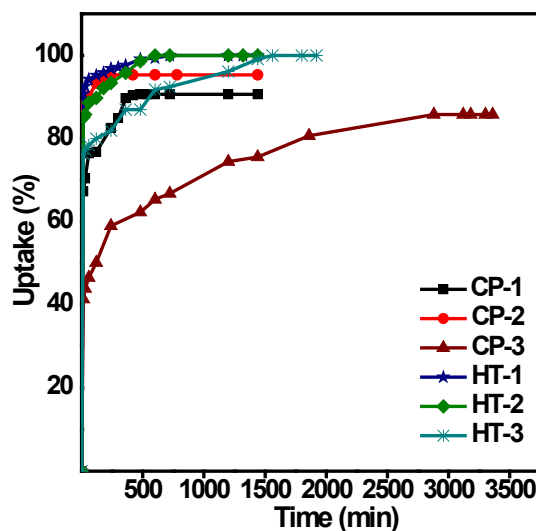

**Figure S1.** Effect of contact time on Mo uptake on synthesized  $\text{CeO}_2$  NPs ( $C_0 = 50 \text{ mg.L}^{-1}$ ,  $\text{pH} = 3$ ,  $V/m = 100 \text{ mL.g}^{-1}$ , and  $\text{temp} = 25 \pm 1 \text{ }^\circ\text{C}$ ).
